# Supplementary material
Source: PubMed Central journal article supplement (PMC2712155)
Supplement: mmc1.pdf [file mmc1.pdf]

Biophysical Journal Volume 96

**Supporting Material**

**A stochastic four-state model of contingent gating of gap junction channels containing two 'fast' gates sensitive to transjunctional voltage**

Nerijus Paulauskas, Mindaugas Pranevicius, Henrikas Pranevicius, and Feliksas F. Bukauskas

## Supplement – 1

Shown in Figures S-1, S-2 and S-3 are the screen captures obtained by simulating voltage gating using three different  $V_j$ -protocols: 1) consecutive  $V_j$  steps rising in the amplitude, 2) slowly rising  $V_j$  ramps, and 3) series of  $V_j$  steps. Fig. S-4 shows  $g_j$ ,  $I_j$  and  $V_j$  plots over time obtained by simulating  $g_j$ - $V_j$  dependence shown in Fig. 7A. In all presented examples the junction comprised 1000 GJ channels.

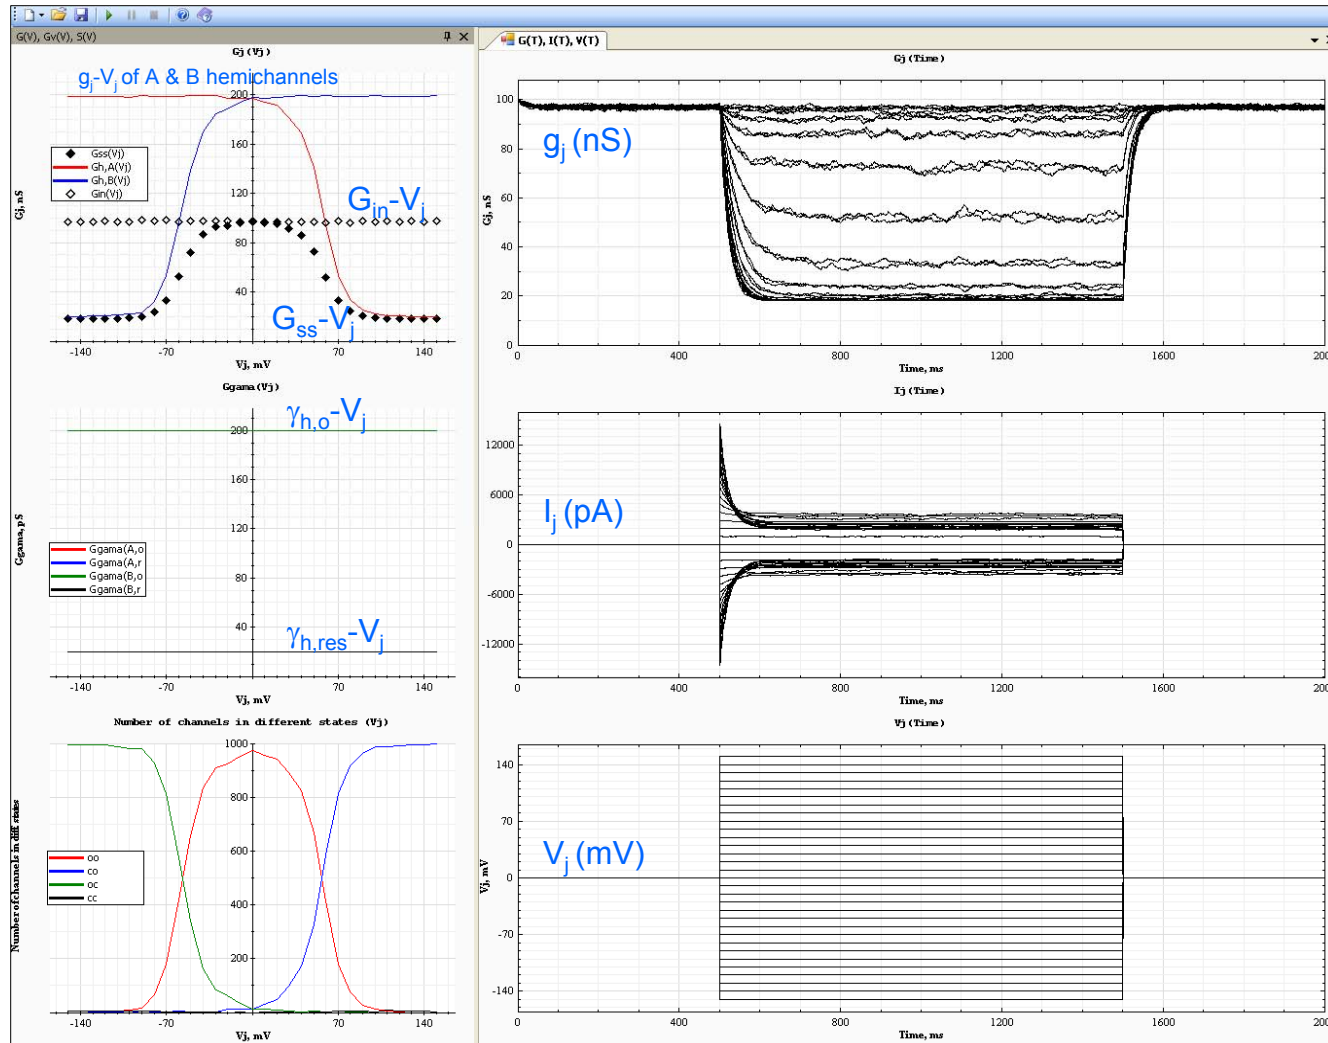

Fig. S-1.  $V_j$ -gating in GJs simulated by applying consecutive  $V_j$  steps increasing in amplitude,  $\Delta V_j = 10$  mV. Simulation was performed using following parameters:  $\gamma_{h,o} = 200$  pS,  $\gamma_{h,res} = 20$  pS,  $V_{h,o} = 40$  mV,  $A_h = 0.1$  mV $^{-1}$ ,  $\sigma_o = \infty$  and  $\sigma_{res} = \infty$ . Calculation time,  $\sim 12$  s.

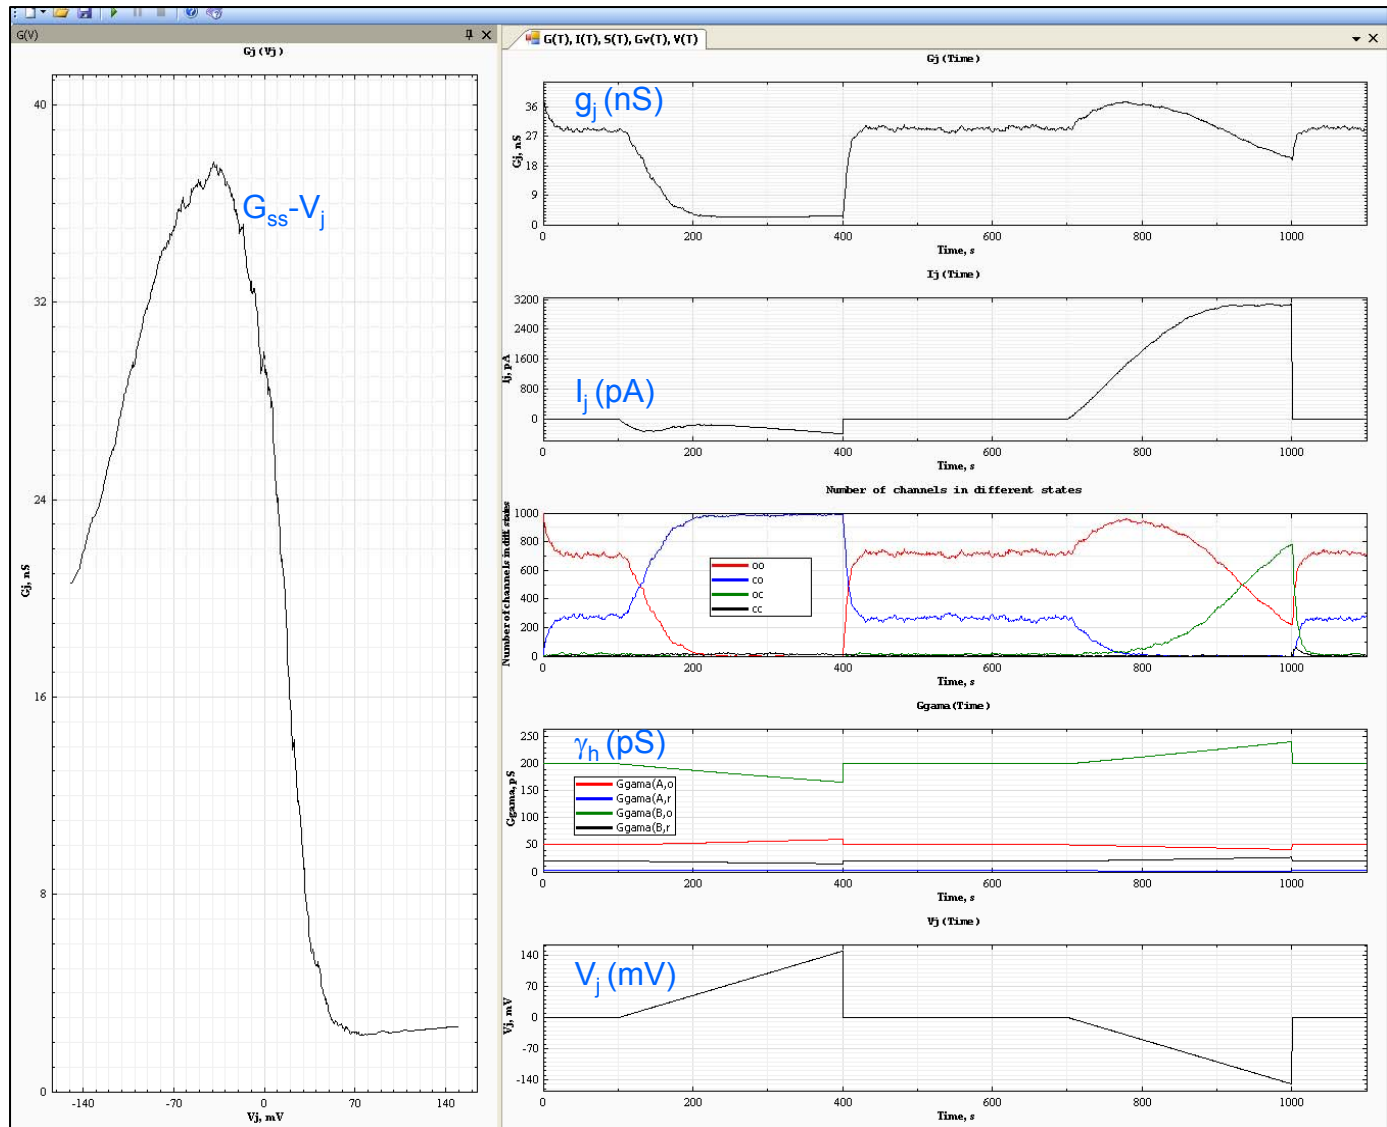

Fig. S-2.  $V_j$ -gating in heterotypic junction simulated by applying slowly rising  $V_j$  ramps. Parameters for hemichannel A:  $\gamma_{hA,o} = 50$  pS,  $\gamma_{hA,res} = 2$  pS,  $V_{hA,o} = 10$  mV,  $A_{hA} = 0.1$  mV $^{-1}$ ,  $\omega_{hA,o} = 800$  mV and  $\omega_{hA,res} = 500$  mV. Parameters for hemichannel B:  $\gamma_{hB,o} = 200$  pS,  $\gamma_{hB,res} = 20$  pS,  $V_{hB,o} = 40$  mV,  $A_{hB} = 0.1$  mV $^{-1}$ ,  $\omega_{hB,o} = 800$  mV and  $\omega_{hB,res} = 500$  mV 11. Calculation time,  $\sim 2$  s.

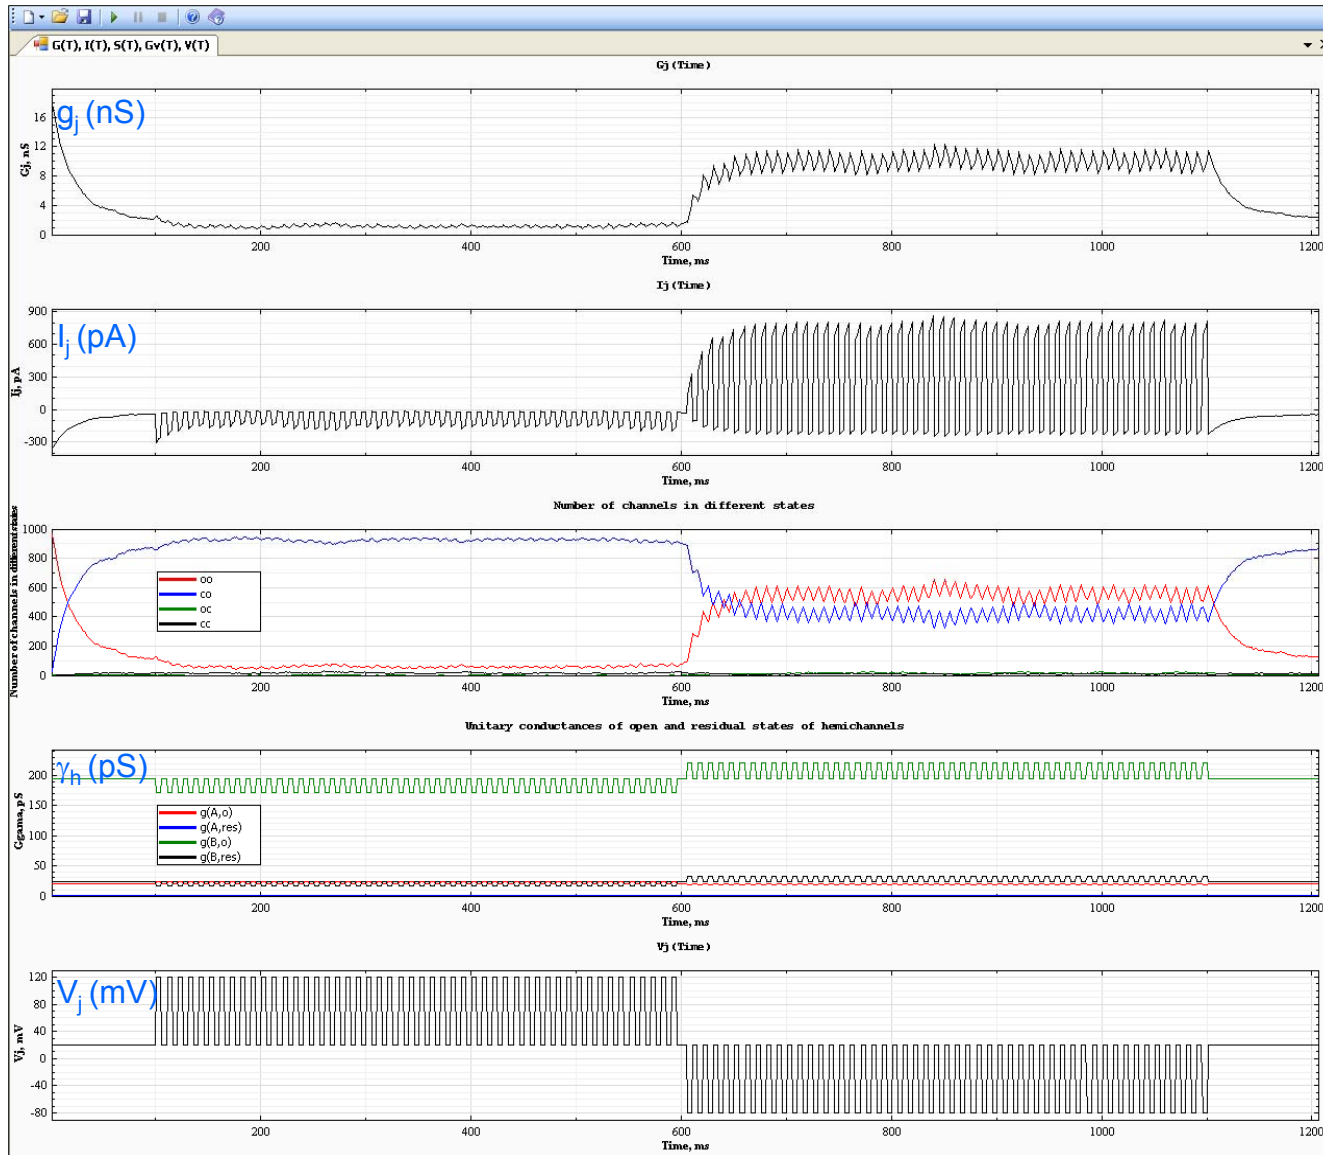

Fig. S-3. Simulation of signal transfer asymmetry in a heterotypic junction using series of negative and positive  $V_j$  steps. Duration and amplitude of individual steps were 5 ms and 100 mV, respectively. Parameters for hemichannel A:  $\gamma_{hA,o} = 20$  pS,  $\gamma_{hA,res} = 1$  pS,  $V_{hA,o} = 1$  mV,  $A_{hA} = 0.1$  mV<sup>-1</sup>,  $\omega_{hA,o} = 800$  mV and  $\omega_{hA,res} = 300$  mV. Parameters for hemichannel B:  $\gamma_{hB,o} = 200$  pS,  $\gamma_{hB,res} = 25$  pS,  $V_{hB,o} = 40$  mV,  $A_{hB} = 0.1$  mV<sup>-1</sup>,  $\omega_{hB,o} = 800$  mV and  $\omega_{hB,res} = 300$  mV. Calculation time, ~2 s.

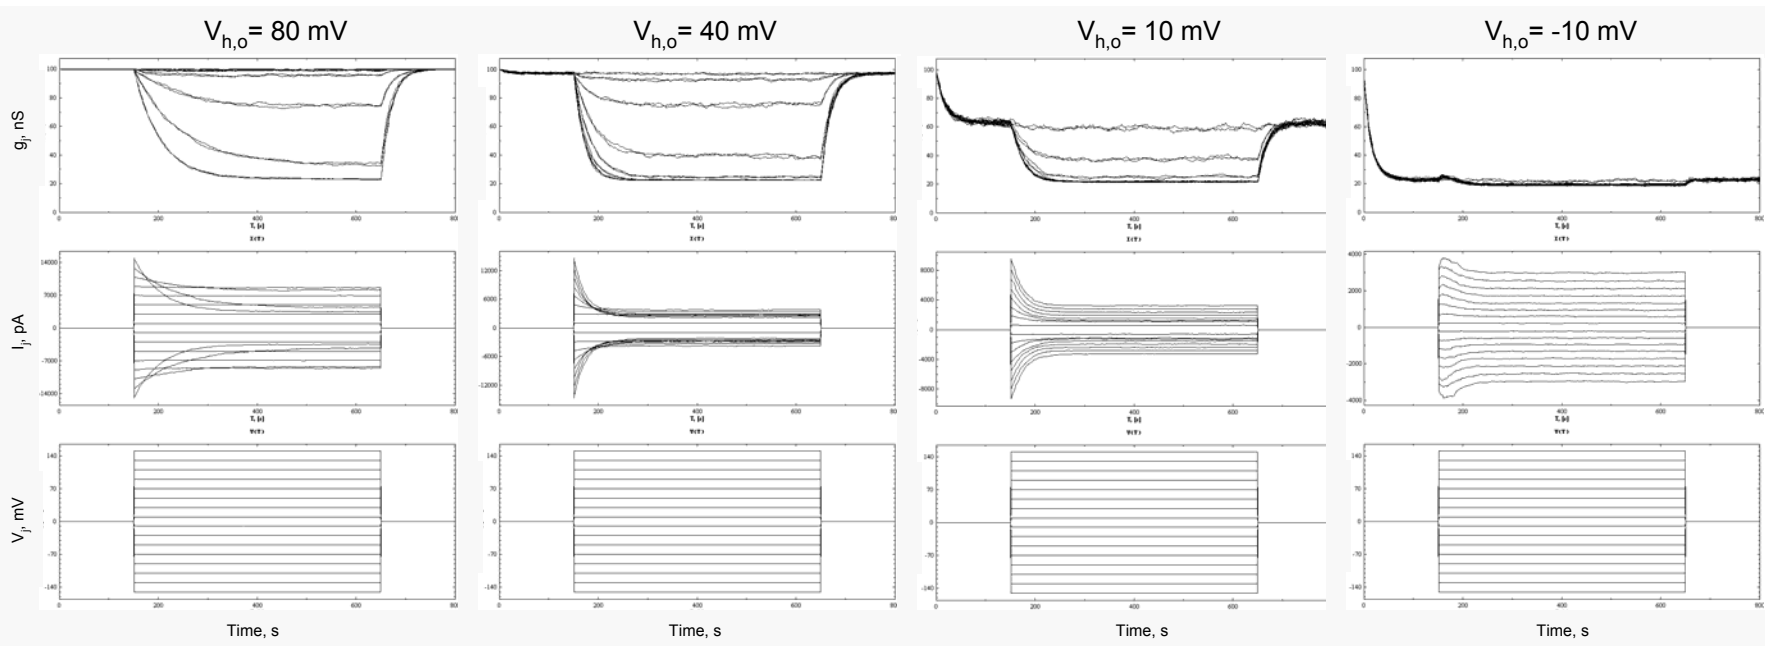

Fig. S-4. Shown are  $g_j$ ,  $I_j$  and  $V_j$  plots over time obtained by simulating  $g_j$ - $V_j$  dependence shown in Fig. 7A at four different  $V_{h,o}$ s: 80, 40, 10 and -10 mV.  $V_j$ -gating was examined using consecutive  $V_j$  steps rising in amplitude by 20 mV.

## Supplement-2

### Description of aggregates used to elaborate an algorithm for the analysis of voltage-gating properties of gap junction channels.

The model is realized using piece-linear aggregate (PLA) formalization method [1,2]. Formalized system is represented as a set of aggregates,  $S = \{A_1, \dots, A_n\}$ . Each aggregate includes:

1. Input signals:  $X$ .
2. Output signals:  $Y$ .
3. External events:  $E'$ .
4. Interval events:  $E''$ .
5. Controlling sequences, which define time instances when internal events occur.
6. Parameter  $z(t)$  that describes the state of the aggregate,  $z(t) \in Z$ . State  $z(t)$  consists from discrete  $v(t)$  and continuous  $z_v(t)$  components:

$$z(t) = (v(t), z_v(t)).$$

7. Initial state

$$z(t_0) = (v(t_0), z_v(t_0)).$$

8. Transition operators:  $H(e_i)$ ,  $e_i \in E' \cup E''$ . These operators describe change of the state of aggregate after event  $e_i$ .  $H(e_i): Z \times (E' \cup E'') \rightarrow Z$ .

9. Output operators:  $G(e_i)$ ,  $e_i \in E' \cup E''$ . These operators describe output signals which occur after event  $e_i$ .

$$G(e_i): Z \times (E' \cup E'') \rightarrow Y.$$

Links between aggregates are described by the relationship:

$$R: \bigcup_{i=1}^n \{X_i\} \rightarrow \bigcup_{i=1}^n \{Y_i\}.$$

### 1. Conceptual model

Let us assume that a gap junction (GJ) plaque is composed from  $n$  GJ channels,  $C_i$  ( $i \in \{1, 2, \dots, n\}$ ) (Fig. 1). GJ channel consists of two hemichannels each containing the gate,  $a_j$  ( $j = \overline{1, 2}$ ) (Fig. 2). Every gate,  $a_{ij}$ , has conductance  $g_{ij}$ , which is derived from the transjunctional voltage ( $U$ ) and the state of the gate ( $s_{ij}$ ). It is assumed that voltage across the hemichannel is equal to voltage across the gate.

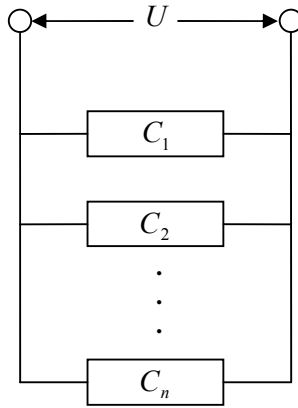

**Fig. 1.** Schematics of the system composed of  $n$  GJ channels arranged in parallel fashion.

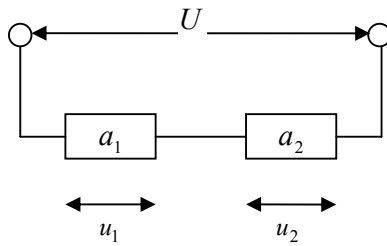

**Fig. 2.** Schematics of a GJ channel that consists of two hemichannels containing gates,  $a_1$  and  $a_2$ , sensitive to voltage across each of them,  $u_1$  and  $u_2$  ( $U = u_1 + u_2$ ).

An example of  $U$  changes over time is shown in Fig. 3.

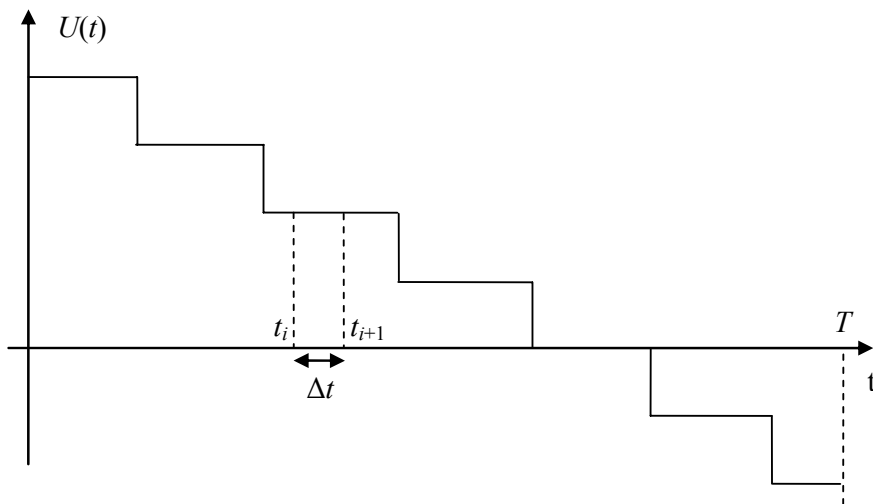

**Fig. 3.** An example of stepwise  $U$  changes over time.

Each gate can be in two states: o – open or c – closed (Fig. 4). Change in the gate state can occur at the discrete moments. Probabilities of transitions depend on  $u_j(t)$ ,  $j = \overline{1,2}$ ,  $t \in [0, T]$ .

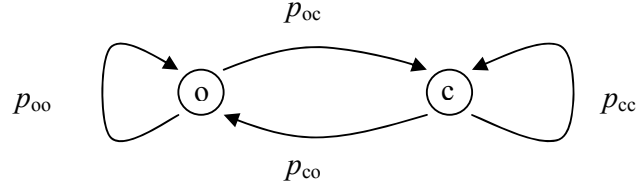

**Fig. 4.** Schematics of open and closed states of the gate.  $p_{oc}$  and  $p_{co}$  are probabilities of transitions between the states; and  $p_{oo}$  and  $p_{cc}$  are probabilities to remain in the same state.

Conductance of ‘left’ and ‘right’ hemichannels ( $g_l$  and  $g_r$ ) depend on the state of their gates ( $s_l(t)$  and  $s_r(t)$ ;  $s_l, s_r \in \{o, c\}$ ) and voltage across them ( $u_l(t)$  and  $u_r(t)$ ;  $t \in [0, T]$ ) to account conductance rectification:

$$g_l = g(s_l(t), u_l(t)) \text{ and } g_r = g(s_r(t), u_r(t)).$$

Then, macroscopic junctional conductance is as follows:

$$g(t) = \sum_{i=1}^n g_i(t),$$

where  $g_i(t)$  – conductance of the  $i$ -th GJ channel at the time  $t$ ,  $n$  – number of the channels. Conductance of GJ channel can be expressed through conductances of hemichannels in series,  $g_i = g_{il} \cdot g_{ir} / (g_{il} + g_{ir})$ . The model has to estimate conductance of each GJ channel at time moments,  $t_i$  ( $i \in \{1, 2, \dots, m\}$ ),  $t_{i+1} = t_i + \Delta t$ ,  $m\Delta t = T$ ).

## 2. Aggregate model

The model of gap junctions is composed from  $n+2$  aggregates as shown in Fig. 5. The aggregate ‘*Transjunctional voltage*’ describes voltage loading to GJ channels. The aggregate ‘*GJ*’ describes interaction between aggregate *Transjunctional voltage* and  $C_1, C_2, \dots, C_n$  aggregates that represent a cluster of individual GJ channels. Output  $y_{n+1}$  of *GJ* aggregate is an averaged conductance of GJ channels. Aggregates  $C_1, C_2, \dots, C_n$  describe changes of states and conductance of GJ channels over time.



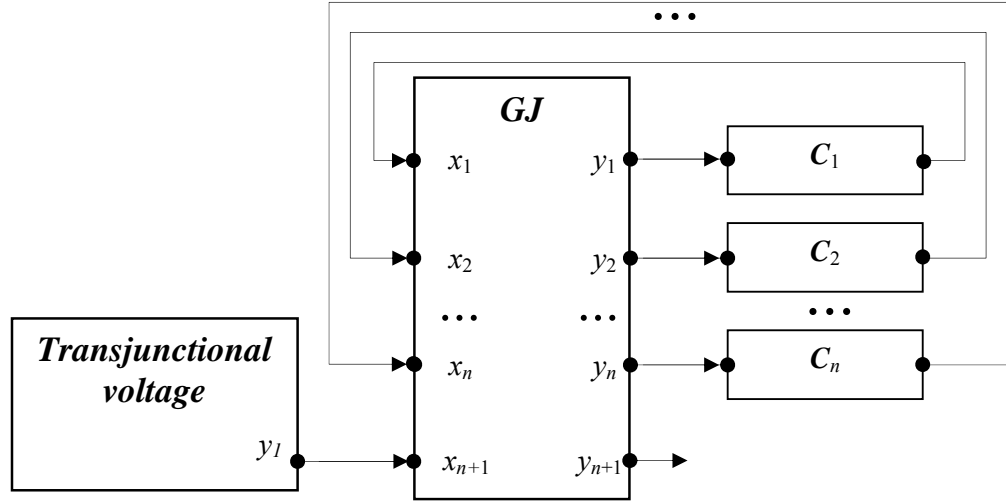

**Fig. 5.** Aggregate scheme of gap junctions.

**Aggregate of *Transjunctional voltage*:**

1. Input signals:  $X = \emptyset$ .
2. Output signals:  $Y = \{y_i\}$ , where  $y_i$  – output voltage.
3. External events:  $E' = \emptyset$ .
4. Internal events:  $E'' = \{e_1''\}$ , where  $e_1''$  – forms output voltage.
5. Controlling sequence,  $e_1'' \mapsto \Delta\tau_1, \Delta\tau_2, \Delta\tau_3, \dots$ , where  $\Delta\tau_i = \Delta\tau = const$  – discrete time interval that defines time instances of output signals.
6. Discrete state of the aggregate:  $v(t_m) = \{U(t_m)\}$ , where  $U(t_m)$  – voltage supplied at  $t_m$ .
7. Continuous component of the aggregate state:  $z_v(t_m) = \{w(e_1'', t_m)\}$ , where  $w(e_1'', t_m)$  indicate time instance when a new value of voltage is supplied to the channels.
8. Initial state:  $t_0 = 0$ ,  $z(t_0) = \{U(t_0), 0\}$ .
9. Voltage loading function:  

$$U(t) : T \rightarrow R.$$
10. Transition ( $H(e_1'')$ ) and output ( $G(e_1'')$ ) operators:

$H(e_1'')$ :

$$v(t_{m+1}) = U(t_{m+1}),$$

$$w(e_1'', t_{m+1}) = t_m + \Delta\tau.$$

$G(e_1'')$ :

$$y_i = U(t_{m+1}).$$

**Aggregate GJ:**

1.  $X = \{x_1, x_2 \dots x_n, x_{n+1}\}$ , where  $x_i = g_i(t_m)$ – conductance of  $i$ -th channel and  $i \in \{1, 2, \dots, n\}$ ,  
 $x_{n+1} = U(t_m)$ – voltage across the channel.
2.  $Y = \{y_1, y_2 \dots y_n, y_{n+1}\}$ , where  $y_i$ – the voltage across  $i$ -th channel and  $i \in \{1, 2, \dots, n\}$ ,  $y_{n+1}$ – an averaged conductance of all GJ channels.
3.  $E' = \{e'_1, e'_2 \dots e'_n, e'_{n+1}\}$ ,  $e'_i$ – external event related with  $x_i$  input.
4.  $E'' = \emptyset$ .
5.  $v(t_m) = \{g_1(t_m), g_2(t_m), \dots, g_n(t_m); \chi_1(t_m), \chi_2(t_m), \dots, \chi_n(t_m)\}$ , where  $g_i(t_m)$ – conductance of  $i$ -th channel;  $\chi_i(t_m)$ – indicator of  $i$ -th channel,  

$$\chi_i(t_m) = \begin{cases} 0, & \text{aggregate has got information about conductance of } i\text{-th channel,} \\ 1, & \text{aggregate is waiting information about conductance of } i\text{-th channel.} \end{cases}$$
6.  $z_v(t_m) = \emptyset$ .
7.  $v(t_0) = \{g_1(t_0), g_2(t_0), \dots, g_n(t_0); \chi_1(t_0), \chi_2(t_0), \dots, \chi_n(t_0)\}$ .
8. Auxiliary variables  $k(t_m), K$  and  $g_{sum}(t_m)$  used for calculation of an averaged conductance of the channel,  $k(t_0) = 0$ ,  $g_{sum}(t_0) = 0$ .
9. Transition ( $H(e'_i)$ ) and output ( $G(e'_i)$ ) operators:

$G(e'_{n+1})$ :

$$y_1 = x_{n+1}, y_2 = x_{n+1}, \dots, y_n = x_{n+1}.$$

$H(e'_i)$ :

$$k(t_{m+1}) = \begin{cases} 1, & \sum_{k=1}^n \chi_k(t_{m+1}) = 0 \wedge k(t_m) = K, \\ k(t_m) + 1, & \sum_{k=1}^n \chi_k(t_{m+1}) = 0 \wedge k(t_m) < K, \end{cases}$$

$$\forall j \in \{1, 2, \dots, n\}: \chi_j(t_{m+1}) = \begin{cases} 0, & i = j \wedge \sum_{k=1}^n \chi_k(t_m) < n-1, \\ \chi_j(t_m), & i \neq j \wedge \sum_{k=1}^n \chi_k(t_m) < n-1, \\ 1, & \sum_{k=1}^n \chi_k(t_m) = n-1, \end{cases}$$

$$\forall j \in \{1, 2, \dots, n\}: g_j(t_{m+1}) = \begin{cases} x_j, & i = j, \\ g_j(t_m), & i \neq j, \end{cases}$$

$$g_{sum}(t_{m+1}) = \begin{cases} \frac{1}{n} \sum_{k=1}^n g_k(t_{m+1}), & k(t_{m+1}) = 1, \\ g_{sum}(t_m), & k(t_{m+1}) = k(t_m), \\ g_{sum}(t_m) + \frac{1}{n} \sum_{k=1}^n g_k(t_{m+1}), & k(t_{m+1}) \neq k(t_m). \end{cases}$$

$G(e'_i)$ :

$$y_{n+1} = \frac{g_{sum}(t_{m+1})}{K}, \text{ if } k(t_m) = K.$$

**Aggregate  $C_i$ ,  $i = 1, 2, \dots, n$ :**

1.  $X = \{x_i\}$ , where  $x_i = u(t_m)$ – voltage across  $i$ -th channel.
2.  $Y = \{y_1\}$ , where  $y_1$ – channel conductance.
3.  $E' = \{e'_i\}$ , where  $e'_i$ – voltage across  $i$ -th channel.

4.  $E'' = \{e_1''\}$ , where  $e_1''$  – event initiating a new state of  $i$ -th channel.
5. Controlling sequence  $e_1'' \mapsto \Delta t_1, \Delta t_2, \Delta t_3, \dots$ , where  $\Delta t_i = \Delta t = const$  – time interval during which a new state of the channel is calculated.
6. Discrete state of aggregate at time  $t_m$ :  $v(t_m) = \{u(t_m), u_r(t_m), u_l(t_m), s_r(t_m), s_l(t_m), g_i(t_m)\}$ , where  $u(t_m)$  – voltage across  $i$ -th channel,  $u_r(t_m), u_l(t_m)$  – voltage across right and left gates, respectively,  $s_r(t_m), s_l(t_m)$  – states of right and left gates, respectively,  $g_i(t_m)$  – conductance of  $i$ -th channel.
7. Continuous component of the aggregate state:  $z_v(t_m) = \{w(e_1'', t_m)\}$ , where  $w(e_1'', t_m)$  – time instance at which a new state of channel is determined and conductance is calculated.
8.  $v(t_0) = \{u(t_0), u_r(t_0), u_l(t_0), s_r(t_0), s_l(t_0), g_i(t_0)\}$ ,  $z_v(t_0) = \{\infty\}$ .
9. Transition ( $H(e_1'')$ ), ( $H(e_1'')$ ) and output ( $G(e_1'')$ ) operators:

$H(e_1'')$ :

$$\begin{aligned} w(e_1'', t_{m+1}) &= t_m, \\ u(t_{m+1}) &= x_1. \end{aligned}$$

$H(e_1'')$ :

$$\begin{aligned} s_r(t_{m+1}) &= \begin{cases} o, & (s_r(t_m) = o \wedge \xi < p_{oo}^r(t_m)) \vee (s_r(t_m) = c \wedge \xi < p_{co}^r(t_m)), \\ c, & (s_r(t_m) = o \wedge p_{oo}^r(t_m) \leq \xi \leq 1) \vee (s_r(t_m) = c \wedge p_{co}^r(t_m) \leq \xi \leq 1), \end{cases} \\ s_l(t_{m+1}) &= \begin{cases} o, & (s_l(t_m) = o \wedge \xi < p_{oo}^l(t_m)) \vee (s_l(t_m) = c \wedge \xi < p_{co}^l(t_m)), \\ c, & (s_l(t_m) = o \wedge p_{oo}^l(t_m) \leq \xi \leq 1) \vee (s_l(t_m) = c \wedge p_{co}^l(t_m) \leq \xi \leq 1), \end{cases} \\ u_r(t_{m+1}) &= \frac{u(t_{m+1})g(t_m)}{g_r(t_m)}, \\ u_l(t_{m+1}) &= \frac{u(t_{m+1})g(t_m)}{g_l(t_m)}, \\ g_r(t_{m+1}) &= f(s_r(t_{m+1}), v_r(t_{m+1})), \\ g_l(t_{m+1}) &= f(s_l(t_{m+1}), v_l(t_{m+1})), \\ g(t_{m+1}) &= \frac{g_r(t_{m+1}) + g_l(t_{m+1})}{g_l(t_{m+1}) \cdot g_r(t_{m+1})}, \\ w(e_1'', t_{m+1}) &= t_m + \Delta t. \end{aligned}$$

$G(e_1'')$ :

$$y_1 = g_i(t_{m+1}).$$

## References:

1. Pranevicius H. 2005. Formal specification of computer network protocols: aggregate approach. Kaunas, Lithuania: "Technologija". 188 p.
2. Pakevicius S., A. Kazla, and H. Pranevicius. 2006. Extension of PLA specification for dynamic system formalization. Information Technology. N35, 235-242.
